# Supplementary material
Source: PubMed Central journal article supplement (PMC2902757)
Supplement: supp_182_1_25__1.pdf [file supp_182_1_25__1.pdf]

**Online Data Supplement**

**Prenatal maternal stress and cord blood innate and adaptive cytokine responses:  
The Urban Environment and Childhood Asthma Study (URECA)**

Rosalind J. Wright  
Cindy M. Visness  
Agustin Calatoni  
Mitchell Grayson  
Diane R. Gold  
Megan Sandel  
Aviva Lee-Paritz  
Robert Wood  
Meyer Kattan  
Gordon Bloomberg  
Melissa Burger  
Alkis Togias  
Frank Witter  
Rhoda Sperling  
Yoel Sadovsky  
James Gern

## **Study Population**

Exclusion criteria included factors that potentially affect lung or immune system development (e.g., maternal human immunodeficiency virus at delivery and newborn factors including significant congenital anomalies, pneumonia requiring antibiotic treatment for 1 week or more, and respiratory distress requiring either intubation and ventilation for 4 or more hours or supplemental oxygen or continuous positive airway pressure for 4 or more days). Between February 2005 and March 2007, 1853 families were screened, 779 met eligibility criteria, and 557 were enrolled(26). Table E1 shows maternal characteristics at screening by enrollment status; no significant differences were seen between the two groups based on sociodemographic factors, maternal asthma, or stress indices minimizing concern for selection bias.

Table E1. Maternal characteristics at screening by enrollment status

|                                                    | Enrolled |       | Not Enrolled |       | p-value |
|----------------------------------------------------|----------|-------|--------------|-------|---------|
|                                                    | n        | %     | n            | %     |         |
| Total Mothers                                      | 557      | 100.0 | 218          | 100.0 |         |
| Mother's age in years at recruitment (mean, range) | 24.5     | 13-42 | 24.2         | 14-47 | 0.55    |
| Race or ethnicity of mother                        |          |       |              |       |         |
| Hispanic of any race                               | 107      | 19.4  | 25           | 12.6  | 0.29    |
| Black alone                                        | 390      | 70.9  | 152          | 76.4  |         |
| White alone                                        | 22       | 4.0   | 9            | 4.5   |         |
| More than one race                                 | 20       | 3.6   | 9            | 4.5   |         |
| All others                                         | 11       | 2.0   | 4            | 2.0   |         |
| Missing                                            | 7        | --    | 19           | --    |         |
| Household income < \$15,000 per year               | 314      | 69.0  | 110          | 71.9  | 0.50    |
| Mother's education                                 |          |       |              |       |         |
| < High school                                      | 231      | 42.0  | 88           | 44.4  | 0.60    |
| High school or GED                                 | 183      | 33.3  | 68           | 34.3  |         |
| > High school                                      | 136      | 24.7  | 42           | 21.2  |         |
| Maternal asthma                                    | 307      | 55.3  | 123          | 56.4  | 0.78    |
| Difficult Life Circumstances (mean, range)         | 4.1      | 0-16  | 3.9          | 0-12  | 0.33    |
| Neighborhood/block conditions (mean, range)        | 7.4      | 0-24  | 6.7          | 0-24  | 0.17    |
| Perceived community violence (mean, range)         | 1.1      | 0-5   | 1.0          | 0-4   | 0.34    |
| Rating of home (mean, range)                       | 7.0      | 1-10  | 6.8          | 1-10  | 0.57    |
